# Supplementary material for: The Association of Levels of and Decline in Grip Strength in Old Age with Trajectories of Life Course Occupational Position
Source: PubMed Central journal article supplement (PMC4883757; doi:10.1371/journal.pone.0155954), 2016-05-27
Supplement: pone.0155954.s001.pdf [file pone.0155954.s001.pdf]

**The association of level and decline in grip strength in old age with trajectories of life course occupational position**

Hannes Kröger, Johan Fritzell, Rasmus Hoffmann

**S1 – Appendix**

**Table of Contents**

|                                                                              |           |
|------------------------------------------------------------------------------|-----------|
| <b>Formulas for the estimation of the LGM and the generalization of SRA2</b> |           |
| <b>Results from the latent growth model</b>                                  | <b>4</b>  |
| <b>Results for blue collar workers versus white collars workers</b>          | <b>6</b>  |
| <b>Results controlling for height and weight</b>                             | <b>10</b> |
| <b>Results including individuals with one or two missing values on OP</b>    | <b>14</b> |
| <b>Results using missing at random assumption (MAR)</b>                      | <b>18</b> |

## Formulas for the estimation of the LGM and the generalization of SRA

The LGM is defined in the following way:

$$\mathbf{y}_i = \mathbf{A}\boldsymbol{\eta}_i + \boldsymbol{\epsilon}_i$$

$$\boldsymbol{\eta}_i = \boldsymbol{\mu}_\eta + \boldsymbol{\zeta}_i \quad (1)$$

The index  $i$  refers to the observed individuals.  $\mathbf{y}$  is the vector of the five observed measures of grip strength,  $\mathbf{A}$  is the vector of constraints, identifying intercept and slope.  $\boldsymbol{\epsilon}_i$  represents the vector of individual specific errors in grip strength.  $\boldsymbol{\eta}_i$  contains the values of each individual on the intercept and slope parameter,  $\boldsymbol{\mu}_\eta$  holds the means of the intercept and slope, representing level and decline in physical functioning, and  $\boldsymbol{\zeta}_i$  is the individual deviation from the mean of the intercept and slope, representing the variability in level and decline of physical functioning.

Instead of using the waves as fixed time points we use month specific age at each wave as an individually varying-time point. This increases the precision of estimates and allows us to make age related statements instead of period related statements. This means that  $\mathbf{A}$  takes the form:

$$\mathbf{A} = \begin{bmatrix} 1 & age_{1i} \\ 1 & age_{2i} \\ 1 & age_{3i} \\ 1 & age_{4i} \\ 1 & age_{5i} \end{bmatrix}$$

Age is centered at 75, so that all reports of the intercept refer to this age. Applying the pattern-mixture approach to account for non-random drop-out the mean of the intercept and slope of the LGM are estimated as the weighted average of the intercept and slope of each of the five missing patterns, where  $\pi_p$  is the proportion of pattern  $p$  of the total sample:

In our structural equation model the intercept and slope are predicted by exposure in the three periods of life course and all their interactions ( $\mathbf{X}_i$ ) and controlled for differences between countries and cohorts ( $\mathbf{C}_i$ ):

$$\boldsymbol{\eta}_i = \boldsymbol{\mu}_\eta + \mathbf{X}_i\boldsymbol{\beta}_\eta + \mathbf{C}_i\boldsymbol{\gamma}_\eta + \boldsymbol{\zeta}_i \quad (2)$$

The vector of coefficients is independently estimated for intercept and slope. Applying the pattern-mixture approach to account for non-random drop-out the mean of the intercept and slope of the LGM and their association with countries and life course SES are estimated as the weighted average of the respective estimates in each of the five missing patterns. Note that for identification purposes two parameters reflecting unique effect of life course trajectory (101) and (010) had to be constrained to be equal across missing patterns.  $\pi_p$  is the proportion of pattern  $p$  of the total sample:

$$\begin{aligned} \boldsymbol{\mu}_\eta &= \pi_1 * \boldsymbol{\mu}_{\eta 1} + \pi_2 * \boldsymbol{\mu}_{\eta 2} + \pi_3 * \boldsymbol{\mu}_{\eta 3} + \pi_4 * \boldsymbol{\mu}_{\eta 4} + \pi_5 * \boldsymbol{\mu}_{\eta 5} \\ \boldsymbol{\beta}_\eta &= \pi_1 * \boldsymbol{\beta}_{\eta 1} + \pi_2 * \boldsymbol{\beta}_{\eta 2} + \pi_3 * \boldsymbol{\beta}_{\eta 3} + \pi_4 * \boldsymbol{\beta}_{\eta 4} + \pi_5 * \boldsymbol{\beta}_{\eta 5} \end{aligned}$$

$$Y_{\eta} = \pi_1 * Y_{\eta 1} + \pi_2 * Y_{\eta 2} + \pi_3 * Y_{\eta 3} + \pi_4 * Y_{\eta 4} + \pi_5 * Y_{\eta 5}$$

To test for life course patterns, equation (2) is restricted as described in Mishra et al.<sup>1</sup> for accumulation, critical period and social mobility and as described in Mishra et al.<sup>2</sup> for sensitive periods (see below for details). For each of the set of restrictions representing one life course model M, the Wald statistic is then calculated as:

$$W_{\eta M} = R_M \beta'_{\eta} \times \left( R_M V_{\beta_{\eta}} R'_M \right)^{-1} R \beta_{\eta}, W_{\eta M} \sim \chi^2_{q_M} \quad (3)$$

$V_{\beta_{\eta}}$  is the variance-covariance matrix of the estimated coefficients  $\beta_{\eta}$  and  $q_M$  the degrees of freedom depending on the life course model. Based on the Wald-statistic the p-values are calculated from  $\chi^2$  distribution with the respective degrees of freedom. The Akaike information criterion (AIC) is calculated as:

$$AIC_{\eta M} = AIC_{sat} + W_{\eta M} - 2q_M$$

Table A. The technical restrictions that are used are the following:

| Life course model                    | Coefficient restriction                                                                           |
|--------------------------------------|---------------------------------------------------------------------------------------------------|
| Null-model                           | $\beta_1 = \beta_2 = \beta_3 = \beta_{12} = \beta_{13} = \beta_{23} = \beta_{123} = 0$            |
| Accumulation                         | $\beta_1 = \beta_2 = \beta_3; \beta_{12} = \beta_{13} = \beta_{23} = \beta_{123} = 0$             |
| Critical period (childhood)          | $\beta_2 = \beta_3 = \beta_{12} = \beta_{13} = \beta_{23} = \beta_{123} = 0$                      |
| Critical period (early adulthood)    | $\beta_1 = \beta_3 = \beta_{12} = \beta_{13} = \beta_{23} = \beta_{123} = 0$                      |
| Critical period (midlife)            | $\beta_1 = \beta_2 = \beta_{12} = \beta_{13} = \beta_{23} = \beta_{123} = 0$                      |
| Social mobility (inter-generational) | $\beta_{23} = -(\beta_2 + \beta_3); \beta_1 = \beta_{12} = \beta_{13} = \beta_{123} = 0$          |
| Social mobility (intra-generational) | $\beta_{12} = -(\beta_1 + \beta_2); \beta_3 = \beta_{13} = \beta_{23} = \beta_{123} = 0$          |
| Social mobility (any)                | $\beta_2 = (\beta_1 + \beta_3); \beta_{12} = \beta_{23} = -\beta_2; \beta_{13} = \beta_{123} = 0$ |
| Sensitive Period                     | $\beta_{12} = \beta_{13} = \beta_{23} = \beta_{123} = 0$                                          |

1. Mishra G, Nitsch D, Black S, Stavola BD, Kuh D, Hardy R. A structured approach to modelling the effects of binary exposure variables over the life course. *Int J Epidemiol.* 2009 Jan 4;**38**(2):528–537.

2. Mishra GD, Chiesa F, Goodman A, Stavola BD, Koupil I. Socio-economic position over the life course and all-cause, and circulatory diseases mortality at age 50–87 years: results from a Swedish birth cohort. *Eur J Epidemiol.* 2013;**28**(2):139–147.

## Results from the latent growth model

Table B. Mean and covariance structure of the latent growth model with linear slope

| Parameter                        | Women                  | Men                    |
|----------------------------------|------------------------|------------------------|
| Mean(Intercept)                  | 23.60<br>[23.38;23.82] | 37.54<br>[37.28;37.80] |
| Mean(Slope)                      | -0.42<br>[-0.45;-0.39] | -0.70<br>[-0.74;-0.66] |
| Variance(Intercept)              | 19.36<br>[17.73;20.98] | 40.42<br>[37.63;43.21] |
| Variance(Slope)                  | 0.03<br>[0.00;0.06]    | 0.09<br>[0.04;0.14]    |
| Correlation(Intercept.Slope)     | -0.11<br>[-0.28;0.07]  | 0.04<br>[-0.09;0.17]   |
| e.Variance(grip strength wave 1) | 13.40<br>[11.30;15.49] | 20.64<br>[17.97;23.30] |
| e.Variance(grip strength wave 2) | 19.19<br>[15.91;22.47] | 28.09<br>[24.60;31.58] |
| e.Variance(grip strength wave 3) | 20.12<br>[16.39;23.85] | 34.13<br>[28.43;39.82] |
| e.Variance(grip strength wave 4) | 8.74<br>[7.53;9.94]    | 19.94<br>[16.99;22.90] |
| e.Variance(grip strength wave 5) | 10.57<br>[8.07;13.07]  | 17.66<br>[14.99;20.34] |

*Note:* Means are reported in kg. The mean of the intercept refers to the average level of grip strength at age 75. The mean of the slope refers to the average decline per year in grip strength.

Table C. Model fit (BIC) of three specifications of the slope for the latent growth model of grip strength using missing at random specification instead of a pattern-mixture model

| Slope | Linear | Quadratic    | Linear semi-parametric |
|-------|--------|--------------|------------------------|
| Men   | 72813  | <b>72804</b> | 72829                  |
| Women | 44081  | <b>44080</b> | 44090                  |

*Note:* Bold numbers indicate best model fit. While quadratic fit is slightly better than linear, it does not justify the additional complexity of the model.

## Results for blue collar workers versus white collars workers

Table D. Predictions of intercept and slope of grip strength by life course OP pattern (kg) - Men

| Trajectory | N    | (%)   | Intercept (at age 75)  | Slope (decline per year) |
|------------|------|-------|------------------------|--------------------------|
| 000        | 517  | 16.86 | 38.43<br>[37.33;39.53] | -0.73<br>[-0.89;-0.56]   |
| 001        | 17   | 0.55  | 34.59<br>[31.18;38.00] | -0.75<br>[-1.23;-0.28]   |
| 010        | 35   | 1.14  | 39.06<br>[37.04;41.08] | -0.77<br>[-1.05;-0.49]   |
| 011        | 120  | 3.91  | 38.99<br>[37.46;40.52] | -0.76<br>[-0.98;-0.54]   |
| 100        | 659  | 21.49 | 38.54<br>[37.46;39.63] | -0.70<br>[-0.87;-0.54]   |
| 101        | 47   | 1.53  | 37.98<br>[36.10;39.86] | -0.47<br>[-0.76;-0.17]   |
| 110        | 207  | 6.75  | 39.01<br>[37.64;40.38] | -0.73<br>[-0.94;-0.52]   |
| 111        | 1465 | 47.77 | 37.56<br>[36.53;38.59] | -0.72<br>[-0.88;-0.56]   |
| Total      | 3067 | 100   | 37.54<br>[37.28;37.80] | -0.70<br>[-0.66;-0.74]   |

*Note:* 95% confidence interval in brackets. Trajectories are described by 1 for exposure to low OP, and 0 for no exposure. Averaged across countries and predicted for the level of the cohorts 1931-1993. OP is coded as blue-collar (ISCO major groups 6-9) versus white collar workers.

Table E. Predictions of intercept and slope of grip strength by life course OP pattern (kg) - Women

| Trajectory | N    | (%)   | Intercept (at age 75)  | Slope (decline per year) |
|------------|------|-------|------------------------|--------------------------|
| 000        | 394  | 19.30 | 23.93<br>[22.88;24.97] | -0.43<br>[-0.59;-0.28]   |
| 001        | 22   | 1.08  | 24.42<br>[22.19;26.65] | -0.45<br>[-0.73;-0.16]   |
| 010        | 21   | 1.03  | 21.50<br>[19.13;23.87] | -0.42<br>[-0.78;-0.06]   |
| 011        | 61   | 2.99  | 23.66<br>[22.07;25.24] | -0.37<br>[-0.57;-0.17]   |
| 100        | 658  | 32.24 | 23.83<br>[22.82;24.83] | -0.39<br>[-0.54;-0.24]   |
| 101        | 52   | 2.55  | 23.60<br>[21.83;25.36] | -0.42<br>[-0.65;-0.19]   |
| 110        | 127  | 6.22  | 24.40<br>[23.07;25.73] | -0.44<br>[-0.64;-0.23]   |
| 111        | 706  | 34.59 | 23.57<br>[22.49;24.64] | -0.42<br>[-0.58;-0.27]   |
| Total      | 2041 | 100   | 23.60<br>[23.38;23.82] | -0.42<br>[-0.45;-0.39]   |

*Note:* 95% confidence interval in brackets. Trajectories are described by 1 for exposure to low OP, and 0 for no exposure. Averaged across countries and predicted for the level of the cohorts 1931-1993. OP is coded as blue-collar (ISCO major groups 6-9) versus white collar workers.

Table F. Relative model fit of life course model (p-value)

| Life course model                 | Men       |       | Women     |       |
|-----------------------------------|-----------|-------|-----------|-------|
|                                   | Intercept | Slope | Intercept | Slope |
| Null                              | 0.00      | 0.74  | 0.35      | 0.98  |
| Accumulation                      | 0.03      | 0.63  | 0.32      | 0.96  |
| Social mobility - early           | 0.01      | 0.68  | 0.29      | 1.00  |
| Social mobility - late            | 0.00      | 0.90  | 0.18      | 0.93  |
| Social mobility – any             | 0.01      | 0.57  | 0.23      | 0.97  |
| Critical period - Childhood       | 0.00      | 0.68  | 0.26      | 0.96  |
| Critical period – young adulthood | 0.00      | 0.69  | 0.32      | 0.96  |
| Critical period - midlife         | 0.13      | 0.63  | 0.35      | 0.96  |
| Sensitive Periods                 | 0.10      | 0.68  | 0.16      | 0.87  |

*Note:* p-values are calculated based on Wald-tests on parameter constraints. The null model needs to show a value below 0.05. Higher value indicates better model fit relative to the saturated model (for technical details see appendix). SEP is coded as blue-collar (ISCO major groups 6-9) versus white collar workers.



Table G. Relative model fit of life course model (AIC)

| Life course model                 | Men          |       | Women     |       |
|-----------------------------------|--------------|-------|-----------|-------|
|                                   | Intercept    | Slope | Intercept | Slope |
| Null                              | 81907        | 81887 | 50489     | 50483 |
| Accumulation                      | 81899        | 81889 | 50490     | 50485 |
| Social mobility - early           | 81903        | 81890 | 50492     | 50486 |
| Social mobility - late            | 81905        | 81889 | 50493     | 50487 |
| Social mobility – any             | 81902        | 81891 | 50492     | 50486 |
| Critical period - Childhood       | 81906        | 81889 | 50491     | 50485 |
| Critical period – young adulthood | 81904        | 81889 | 50490     | 50485 |
| Critical period - midlife         | <b>81895</b> | 81889 | 50490     | 50485 |
| Sensitive Period                  | 81897        | 81891 | 50494     | 50489 |

*Note:* p-values are calculated based on Wald-tests on parameter constraints. The null model needs to show a value below 0.05. Higher value indicates better model fit relative to the saturated model (for technical details see appendix). Best fit given rejection of the Null model is marked as bold. SEP is coded as blue-collar (ISCO major groups 6-9) versus white collar workers.

## Results controlling for height and weight

Table H. Predictions of intercept and slope of grip strength by life course OP pattern (kg) - Men

| Trajectory | N    | (%)   | Intercept (at age 75)    | Slope (decline per year) |
|------------|------|-------|--------------------------|--------------------------|
| 000        | 2125 | 69.29 | 38.06<br>[ 37.10; 39.02] | -0.69<br>[ -0.84; -0.54] |
| 001        | 62   | 2.02  | 37.04<br>[ 34.92; 39.17] | -0.63<br>[ -0.88; -0.38] |
| 010        | 83   | 2.71  | 37.82<br>[ 36.31; 39.34] | -0.89<br>[ -1.12; -0.66] |
| 011        | 208  | 6.78  | 36.91<br>[ 35.61; 38.20] | -0.57<br>[ -0.76; -0.37] |
| 100        | 315  | 10.27 | 38.63<br>[ 37.44; 39.83] | -0.73<br>[ -0.92; -0.53] |
| 101        | 17   | 0.55  | 37.13<br>[ 33.01; 41.25] | -0.44<br>[ -0.89; 0.00]  |
| 110        | 56   | 1.83  | 38.55<br>[ 36.38; 40.72] | -0.60<br>[ -0.93; -0.27] |
| 111        | 201  | 6.55  | 36.67<br>[ 35.27; 38.07] | -0.76<br>[ -0.97; -0.55] |
| Total      | 3067 | 100   | 37.54<br>[37.28;37.80]   | -0.70<br>[-0.66;-0.74]   |

*Note:* 95% confidence interval in brackets. Trajectories are described by 1 for exposure to low OP, and 0 for no exposure. Averaged across countries and predicted for the level of the cohorts 1931-1993. OP is coded as elementary occupations (ISCO major group 9) versus white collar workers. Controlled for height and weight.

Table I. Predictions of intercept and slope of grip strength by life course OP pattern (kg) - Women

| Trajectory | N    | (%)   | Intercept (at age 75)    | Slope (decline per year) |
|------------|------|-------|--------------------------|--------------------------|
| 000        | 1354 | 66.34 | 23.69<br>[ 22.79; 24.60] | -0.43<br>[ -0.57; -0.29] |
| 001        | 69   | 3.38  | 23.23<br>[ 21.78; 24.67] | -0.30<br>[ -0.52; -0.09] |
| 010        | 74   | 3.63  | 24.39<br>[ 23.09; 25.68] | -0.43<br>[ -0.64; -0.22] |
| 011        | 196  | 9.60  | 23.80<br>[ 22.67; 24.93] | -0.45<br>[ -0.61; -0.29] |
| 100        | 149  | 7.30  | 23.81<br>[ 22.68; 24.94] | -0.45<br>[ -0.63; -0.27] |
| 101        | 13   | 0.64  | 25.19<br>[ 22.82; 27.56] | -0.69<br>[ -1.04; -0.33] |
| 110        | 38   | 1.86  | 24.91<br>[ 23.01; 26.81] | -0.41<br>[ -0.71; -0.12] |
| 111        | 148  | 7.25  | 23.33<br>[ 21.99; 24.67] | -0.38<br>[ -0.58; -0.19] |
| Total      | 2041 | 100   | 23.60<br>[23.38;23.82]   | -0.42<br>[-0.45;-0.39]   |

*Note:* 95% confidence interval in brackets. Trajectories are described by 1 for exposure to low OP, and 0 for no exposure. Averaged across countries and predicted for the level of the cohorts 1931-1993. OP is coded as elementary occupations (ISCO major group 9) versus white collar workers. Controlled for height and weight.

Table J. Relative model fit of life course model (p-value)

| Life course model                 | Men       |       | Women     |       |
|-----------------------------------|-----------|-------|-----------|-------|
|                                   | Intercept | Slope | Intercept | Slope |
| Null                              | 0.01      | 0.10  | 0.44      | 0.49  |
| Accumulation                      | 0.14      | 0.06  | 0.34      | 0.38  |
| Social mobility - early           | 0.06      | 0.04  | 0.35      | 0.36  |
| Social mobility - late            | 0.00      | 0.12  | 0.64      | 0.34  |
| Social mobility – any             | 0.18      | 0.12  | 0.57      | 0.30  |
| Critical period - Childhood       | 0.01      | 0.08  | 0.34      | 0.37  |
| Critical period – young adulthood | 0.21      | 0.06  | 0.39      | 0.37  |
| Critical period - midlife         | 0.84      | 0.10  | 0.35      | 0.39  |
| Sensitive Periods                 | 0.85      | 0.12  | 0.33      | 0.19  |

*Note:* p-values are calculated based on Wald-tests on parameter constraints. The null model needs to show a value below 0.05. Higher value indicates better model fit relative to the saturated model (for technical details see appendix). OP is coded as elementary occupations (ISCO major group 9) versus white collar workers. Controlled for height and weight.

Table K. Relative model fit of life course model (AIC)

| Life course model                 | Men          |       | Women     |       |
|-----------------------------------|--------------|-------|-----------|-------|
|                                   | Intercept    | Slope | Intercept | Slope |
| Null                              | 81117        | 81111 | 49729     | 49729 |
| Accumulation                      | 81111        | 81113 | 49731     | 49731 |
| Social mobility - early           | 81114        | 81115 | 49732     | 49732 |
| Social mobility - late            | 81120        | 81112 | 49730     | 49732 |
| Social mobility – any             | 81111        | 81112 | 49730     | 49733 |
| Critical period - Childhood       | 81119        | 81113 | 49731     | 49731 |
| Critical period – young adulthood | 81110        | 81113 | 49731     | 49731 |
| Critical period - midlife         | <b>81104</b> | 81112 | 49731     | 49731 |
| Sensitive Period                  | 81106        | 81112 | 49733     | 49735 |

*Note:* p-values are calculated based on Wald-tests on parameter constraints. The null model needs to show a value below 0.05. Higher value indicates better model fit relative to the saturated model (for technical details see appendix). Best fit given rejection of the Null model is marked as bold. OP is coded as elementary occupations (ISCO major group 9) versus white collar workers. Controlled for height and weight.

## Results including individuals with one or two missing values on OP

Table L. Predictions of intercept and slope of grip strength by life course OP pattern (kg) - Men

| Trajectory | N    | (%) | Intercept (at age 75)    | Slope (decline per year) |
|------------|------|-----|--------------------------|--------------------------|
| 000        | 517  |     | 38.10<br>[ 37.19; 39.01] | -0.69<br>[ -0.83; -0.56] |
| 001        | 17   |     | 36.88<br>[ 35.20; 38.57] | -0.65<br>[ -0.82; -0.48] |
| 010        | 35   |     | 37.47<br>[ 35.84; 39.10] | -0.90<br>[ -1.14; -0.66] |
| 011        | 120  |     | 36.77<br>[ 35.46; 38.08] | -0.59<br>[ -0.78; -0.40] |
| 100        | 659  |     | 38.88<br>[ 37.71; 40.04] | -0.73<br>[ -0.90; -0.55] |
| 101        | 47   |     | 37.48<br>[ 34.49; 40.46] | -0.40<br>[ -0.82; 0.01]  |
| 110        | 207  |     | 38.39<br>[ 36.43; 40.36] | -0.58<br>[ -0.87; -0.28] |
| 111        | 1465 |     | 36.60<br>[ 35.28; 37.92] | -0.78<br>[ -0.97; -0.58] |
| Total      | 3697 | 100 | 37.20<br>[36.96; 37.45]  | -0.72<br>[-0.68;-0.75]   |

*Note:* 95% confidence interval in brackets. Trajectories are described by 1 for exposure to low OP, and 0 for no exposure. Averaged across countries and predicted for the level of the cohorts 1931-1993. OP is coded as elementary occupations (ISCO major group 9) versus white collar workers. The number of observations of the trajectories does not add up to the total number of observations, because the individuals included who have one or two missing values on OP do not have a fully observed trajectory. However, they contribute to the individual coefficient estimation.

Table M. Predictions of intercept and slope of grip strength by life course OP pattern (kg) - Women

| Trajectory | N    | (%) | Intercept (at age 75)    | Slope (decline per year) |
|------------|------|-----|--------------------------|--------------------------|
| 000        | 2125 |     | 23.73<br>[ 22.90; 24.55] | -0.42<br>[ -0.56; -0.28] |
| 001        | 62   |     | 23.52<br>[ 22.27; 24.77] | -0.31<br>[ -0.50; -0.12] |
| 010        | 83   |     | 24.89<br>[ 23.46; 26.32] | -0.43<br>[ -0.66; -0.21] |
| 011        | 208  |     | 23.63<br>[ 22.53; 24.73] | -0.41<br>[ -0.58; -0.24] |
| 100        | 315  |     | 23.81<br>[ 22.71; 24.92] | -0.41<br>[ -0.59; -0.22] |
| 101        | 17   |     | 25.41<br>[ 22.41; 28.42] | -0.64<br>[ -1.03; -0.24] |
| 110        | 56   |     | 25.32<br>[ 23.56; 27.08] | -0.38<br>[ -0.64; -0.11] |
| 111        | 201  |     | 23.32<br>[ 22.14; 24.49] | -0.34<br>[ -0.53; -0.15] |
| Total      | 3374 | 100 | 23.34<br>[23.12;23.48]   | -0.42<br>[-0.40;-0.45]   |

*Note:* 95% confidence interval in brackets. Trajectories are described by 1 for exposure to low OP, and 0 for no exposure. Averaged across countries and predicted for the level of the cohorts 1931-1993. OP is coded as elementary occupations (ISCO major group 9) versus white collar workers. The number of observations of the trajectories does not add up to the total number of observations, because the individuals included who have one or two missing values on OP do not have a fully observed trajectory. However, they contribute to the individual coefficient estimation.

Table N. Relative model fit of life course model (p-value)

| Life course model                 | Men       |       | Women     |       |
|-----------------------------------|-----------|-------|-----------|-------|
|                                   | Intercept | Slope | Intercept | Slope |
| Null                              | 0.00      | 0.05  | 0.18      | 0.60  |
| Accumulation                      | 0.03      | 0.03  | 0.12      | 0.60  |
| Social mobility - early           | 0.03      | 0.02  | 0.09      | 0.38  |
| Social mobility - late            | 0.00      | 0.07  | 0.76      | 0.48  |
| Social mobility – any             | 0.10      | 0.06  | 0.35      | 0.39  |
| Critical period - Childhood       | 0.00      | 0.03  | 0.12      | 0.53  |
| Critical period – young adulthood | 0.10      | 0.03  | 0.13      | 0.51  |
| Critical period - midlife         | 0.54      | 0.07  | 0.17      | 0.65  |
| Sensitive Periods                 | 0.78      | 0.05  | 0.18      | 0.42  |

*Note:* p-values are calculated based on Wald-tests on parameter constraints. The null model needs to show a value below 0.05. Higher value indicates better model fit relative to the saturated model (for technical details see appendix). OP is coded as elementary occupations (ISCO major group 9) versus white collar workers. Analyses include those individuals who have one or two missing values on OP.



Table O. Relative model fit of life course model (AIC)

| Life course model                 | Men          |       | Women     |       |
|-----------------------------------|--------------|-------|-----------|-------|
|                                   | Intercept    | Slope | Intercept | Slope |
| Null                              | 76157        | 76147 | 49340     | 49336 |
| Accumulation                      | 76148        | 76148 | 49342     | 49337 |
| Social mobility - early           | 76149        | 76150 | 49344     | 49340 |
| Social mobility - late            | 76159        | 76147 | 49337     | 49339 |
| Social mobility – any             | 76146        | 76147 | 49340     | 49339 |
| Critical period - Childhood       | 76159        | 76148 | 49342     | 49337 |
| Critical period – young adulthood | 76145        | 76149 | 49342     | 49337 |
| Critical period - midlife         | <b>76139</b> | 76146 | 49341     | 49336 |
| Sensitive Period                  | 76140        | 76148 | 49343     | 49340 |

*Note:* p-values are calculated based on Wald-tests on parameter constraints. The null model needs to show a value below 0.05. Higher value indicates better model fit relative to the saturated model (for technical details see appendix). Best fit given rejection of the Null model is marked as bold. OP is coded as elementary occupations (ISCO major group 9) versus white collar workers. Analyses include those individuals who have one or two missing values on OP.

## Results using missing at random assumption (MAR)

Table P. Relative model fit of life course model (p-value)

| Life course model                 | Men       |       | Women     |       |
|-----------------------------------|-----------|-------|-----------|-------|
|                                   | Intercept | Slope | Intercept | Slope |
| Null                              | 0.00      | 0.35  | 0.20      | 0.57  |
| Accumulation                      | 0.02      | 0.27  | 0.14      | 0.47  |
| Social mobility - early           | 0.00      | 0.18  | 0.11      | 0.41  |
| Social mobility - late            | 0.00      | 0.22  | 0.23      | 0.39  |
| Social mobility – any             | 0.02      | 0.22  | 0.24      | 0.33  |
| Critical period - Childhood       | 0.00      | 0.30  | 0.15      | 0.45  |
| Critical period – young adulthood | 0.06      | 0.27  | 0.14      | 0.51  |
| Critical period - midlife         | 0.45      | 0.26  | 0.21      | 0.45  |
| Sensitive Periods                 | 0.44      | 0.17  | 0.14      | 0.29  |

*Note:* p-values are calculated based on Wald-tests on parameter constraints. The null model needs to show a value below 0.05. Higher value indicates better model fit relative to the saturated model (for technical details see appendix). OP is coded as elementary occupation (ISCO major groups 9) versus all other occupations.

Table Q. Relative model fit of life course model (AIC)

| Life course model                 | Men          |       | Women     |       |
|-----------------------------------|--------------|-------|-----------|-------|
|                                   | Intercept    | Slope | Intercept | Slope |
| Null                              | 72345        | 72325 | 43932     | 43928 |
| Accumulation                      | 72333        | 72326 | 43934     | 43930 |
| Social mobility - early           | 72339        | 72328 | 43935     | 43931 |
| Social mobility - late            | 72346        | 72328 | 43933     | 43931 |
| Social mobility – any             | 72335        | 72328 | 43933     | 43932 |
| Critical period - Childhood       | 72347        | 72326 | 43934     | 43930 |
| Critical period – young adulthood | 72331        | 72326 | 43934     | 43929 |
| Critical period - midlife         | <b>72325</b> | 72327 | 43933     | 43930 |
| Sensitive Period                  | 72327        | 72329 | 43935     | 43933 |

*Note:* p-values are calculated based on Wald-tests on parameter constraints. The null model needs to show a value below 0.05. Higher value indicates better model fit relative to the saturated model (for technical details see appendix). Best fit given rejection of the Null model is marked as bold. OP is coded as elementary occupation (ISCO major group 9) versus all others.
